# Supplementary material for: Adverse event reviews in healthcare: what matters to patients and their family? A qualitative study exploring the perspective of patients and family
Source: PubMed Central journal article supplement — BMJ Open. 2022 May 9;12(5):e060158. doi: 10.1136/bmjopen-2021-060158 (PMC9086600; doi:10.1136/bmjopen-2021-060158), 2022-05-09
Supplement: bmjopen-2021-060158.draft_revisions.pdf [file bmjopen-2021-060158.draft_revisions.pdf]

# BMJ Open

BMJ Open is committed to open peer review. As part of this commitment we make the peer review history of every article we publish publicly available.

When an article is published we post the peer reviewers' comments and the authors' responses online. We also post the versions of the paper that were used during peer review. These are the versions that the peer review comments apply to.

The versions of the paper that follow are the versions that were submitted during the peer review process. They are not the versions of record or the final published versions. They should not be cited or distributed as the published version of this manuscript.

BMJ Open is an open access journal and the full, final, typeset and author-corrected version of record of the manuscript is available on our site with no access controls, subscription charges or pay-per-view fees (<http://bmjopen.bmj.com>).

If you have any questions on BMJ Open's open peer review process please email [info.bmjopen@bmj.com](mailto:info.bmjopen@bmj.com)

# BMJ Open

**Adverse event reviews in healthcare: What matters to patients and their family? A qualitative study exploring the perspective of patients and family.**

|                               |                                                                                                                                                                                                                                                                              |
|-------------------------------|------------------------------------------------------------------------------------------------------------------------------------------------------------------------------------------------------------------------------------------------------------------------------|
| Journal:                      | <i>BMJ Open</i>                                                                                                                                                                                                                                                              |
| Manuscript ID                 | bmjopen-2021-060158                                                                                                                                                                                                                                                          |
| Article Type:                 | Original research                                                                                                                                                                                                                                                            |
| Date Submitted by the Author: | 20-Dec-2021                                                                                                                                                                                                                                                                  |
| Complete List of Authors:     | McQueen, Jean M; NHS Education for Scotland West Region, Person Centred Care<br>Gibson, Kyle; Royal Infirmary of Edinburgh, Intensive Care<br>Manson, Moira; Healthcare Improvement Scotland Glasgow, Assurance<br>Francis, Morag; Healthcare Improvement Scotland, scrutiny |
| Keywords:                     | Health & safety < HEALTH SERVICES ADMINISTRATION & MANAGEMENT, Clinical governance < HEALTH SERVICES ADMINISTRATION & MANAGEMENT, Adverse events < THERAPEUTICS                                                                                                              |
|                               |                                                                                                                                                                                                                                                                              |

SCHOLARONE™  
Manuscripts

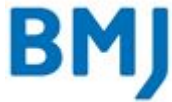

I, the Submitting Author has the right to grant and does grant on behalf of all authors of the Work (as defined in the below author licence), an exclusive licence and/or a non-exclusive licence for contributions from authors who are: i) UK Crown employees; ii) where BMJ has agreed a CC-BY licence shall apply, and/or iii) in accordance with the terms applicable for US Federal Government officers or employees acting as part of their official duties; on a worldwide, perpetual, irrevocable, royalty-free basis to BMJ Publishing Group Ltd ("BMJ") its licensees and where the relevant Journal is co-owned by BMJ to the co-owners of the Journal, to publish the Work in this journal and any other BMJ products and to exploit all rights, as set out in our [licence](#).

The Submitting Author accepts and understands that any supply made under these terms is made by BMJ to the Submitting Author unless you are acting as an employee on behalf of your employer or a postgraduate student of an affiliated institution which is paying any applicable article publishing charge ("APC") for Open Access articles. Where the Submitting Author wishes to make the Work available on an Open Access basis (and intends to pay the relevant APC), the terms of reuse of such Open Access shall be governed by a Creative Commons licence – details of these licences and which [Creative Commons](#) licence will apply to this Work are set out in our licence referred to above.

Other than as permitted in any relevant BMJ Author's Self Archiving Policies, I confirm this Work has not been accepted for publication elsewhere, is not being considered for publication elsewhere and does not duplicate material already published. I confirm all authors consent to publication of this Work and authorise the granting of this licence.

**Title:** Adverse event reviews in healthcare: What matters to patients and their family? A qualitative study exploring the perspective of patients and family.

**Author Names:** Dr Jean McQueen <sup>1</sup>, Dr Kyle Gibson <sup>2</sup>, Moira Manson <sup>3</sup>, Morag Francis <sup>3</sup>

*Authors or their employer 2021: <sup>1</sup> NHS Education for Scotland <sup>2</sup> NHS Lothian <sup>3</sup> NHS Healthcare Improvement Scotland*

**Corresponding author:** [jean.mcqueen2@nhs.scot](mailto:jean.mcqueen2@nhs.scot)

### **Abstract:**

**Objectives:** Explore what ‘good’ patient and family involvement in healthcare adverse event reviews may involve.

**Design:** Data was collected using semi-structured telephone interviews. Interview transcripts were analysed using an inductive thematic approach.

**Setting:** NHS Scotland.

**Participants:** 19 interviews were conducted with patients who had experienced an adverse event during the provision of their healthcare, or their family member.

**Results:** Four key themes were derived from these interviews: trauma, communication, learning and litigation.

**Conclusions:** Findings suggest there are many advantages of actively involving patients and their families in adverse event reviews. An open, collaborative, person-centred approach which listens to, and involves, patients and their families is perceived to lead to improved outcomes for all. For the patient and their family, it can help with reconciliation following a traumatic event and help restore their faith in the healthcare system. For the health service, listening and involving people will likely enhance learning with subsequent improvements in healthcare provision with reduction in risk of similar events occurring for other patients. Communicating in a compassionate manner could also decrease litigation claims following an adverse event. Overall, having personalised conversations and a streamlined review process, with open engagement to enhance learning, was important to most participants in this study.

### **Strengths and limitations of this study**

- This study provides a valuable insight, adding new knowledge to enhance our understanding of what ‘good’ patient and family involvement in adverse event reviews looks like from the perspectives of patients and families themselves.
- In-depth qualitative interviews contributed rich material giving insights into patient and family experience of the adverse event review process and how listening and involving people will likely enhance learning.
- There is a risk of bias most participants who responded to this study had a negative experience during adverse review processes and there may be patients and families who have had positive experiences but were less likely to share these.

1  
2  
3  
4  
5  
6  
7  
8  
9  
10  
11  
12  
13  
14  
15  
16  
17  
18  
19  
20  
21  
22  
23  
24  
25  
26  
27  
28  
29  
30  
31  
32  
33  
34  
35  
36  
37  
38  
39  
40  
41  
42  
43  
44  
45  
46  
47  
48  
49  
50  
51  
52  
53  
54  
55  
56  
57  
58  
59  
60

- Although this study was conducted in Scotland, we suggest the knowledge generated on the perspectives and experiences of patient and family engagement during adverse event reviews will be of value to other health care systems.

For peer review only

## Introduction

Patients and consumers of health care should be at the very centre of the quest to improve patient safety. A major element of programmes designed to improve patient safety, is having the capacity and capability to capture comprehensive information on safety events, errors and near-misses so this can be used as a source of learning, and as the basis for preventive action in the future<sup>1</sup>. Involvement of patients and families in reviews may reveal additional information (which is not currently being captured in some healthcare systems) which could enhance learning, assist with a person-centred approach, and support patients and families with reconciliation after adverse events<sup>2,3</sup>. Organisations which represent patient voices and national enquiries highlight the lack of involvement of patients in Significant Adverse Event Reviews (SAERs) and a culture which often discounts or does not fully incorporate information highlighted by patients and families<sup>4,5</sup>. When things go wrong in healthcare, patients and their families frequently have valuable information which could enhance learning for the healthcare system<sup>1</sup>. They may have additional contextual knowledge, which will support the health service as they devise steps that can be taken to minimise recurrence<sup>6</sup>. On the other hand, poor involvement of patients and families can lead to worsening psychological distress and increased likelihood of complaints and litigation claims<sup>7 8 9 10 11 12</sup>. Whilst the NHS strives to provide safe and effective person-centred care, there is a lack of research focused on how this patient family involvement should be enacted and reflected in adverse event reviews<sup>13</sup>. This study explores the perspectives and experiences of patient and family engagement during adverse event reviews in the NHS in Scotland.

## Current Practice and Research

Within NHS Scotland an adverse event is an event that could have caused (a near miss), or did result in, harm to people or groups of people<sup>14</sup>. The current adverse event review process dictates that patients, service users and their families are told what went wrong, why and receive an apology for any harm that has occurred<sup>14</sup>. Involvement of patients and their family varies with little detail on how best to enact person-centred engagement. In some cases, patients and families are invited to submit questions in advance of the review, whilst in others patients and families may be provided with a copy of the review findings. Less frequently are they invited to share their observations surrounding the event, what mattered (and matters) to them, and how their perspectives could enhance learning. This means their issues and concerns are not always fully known to healthcare managers, with lost opportunity to address these, and the potential for vital learning could be missed. This study aims to enhance our understanding of what 'good' patient and family involvement looks like from the perspectives of patients and families themselves.

## Objective

Our objective was to explore patients and families' experience of involvement in adverse event reviews to understand what 'good' involvement may look like from a patient and family perspective.

## Methods

This study was explorative, using inductive thematic analysis' techniques<sup>15</sup>. Interpretative phenomenological analysis allowed exploration of individuals' lived experience and how they make sense of this<sup>16</sup>.

## Participant selection and recruitment

Participants were recruited between June and November 2021 using a variety of sources: advertisement on websites (callforparticipants.com and Care Opinion), the NHS Scotland Adverse Events Network, and a range of third sector non-government organisations.

Inclusion criteria: participant or family member experienced a serious health care incident/patient safety event in the last 10 years, resides in Scotland, are aged 18 years or over and speak English. Exclusion criteria for this study were patients and families where there was an ongoing investigation or litigation claim, adverse event did not occur within Scotland.

34 potential participants responded with interest and were sent further details by e-mail in the form of a Participant Information Sheet and Consent Form. Two participants were excluded as an adverse review was not undertaken, 4 opted not to proceed and 9 did not reply to follow up emails. A convenience sample of 19 participants provided informed consent and took part in the study. Semi-structured telephone interviews (appendix 1) were conducted with patients or family members of patients who had experienced an adverse event in the last 10 years whilst receiving care from the NHS in Scotland. Each participant took part in one telephone interview which was digitally recorded and subsequently transcribed. Identifying features were removed to ensure confidentiality. Participant characteristics, including the nature of the adverse event, are summarised in Table 1.

**TABLE 1: Participant characteristics (n=19)**

|                                                                                 |                                                                                                                                                                                             |
|---------------------------------------------------------------------------------|---------------------------------------------------------------------------------------------------------------------------------------------------------------------------------------------|
| <b>Gender (number of participants)</b>                                          | <b>Female: 10</b><br><b>Male: 9</b>                                                                                                                                                         |
| <b>Age (number of participants in each age group)</b>                           | 35-44 years: 8<br>45-54 years: 4<br>>55 years: 7                                                                                                                                            |
| <b>Category of adverse event (number of participants in each group)</b>         | Adult death/palliative care: 7<br>Delayed diagnosis: 1<br>Fall: 1<br>Medication error: 1<br>Mental health: 3<br>Addiction: 1<br>Suicide: 1<br>Neonatal death: 2<br>Surgical complication: 2 |
| <b>Duration since adverse event (number of participants in each group)</b>      | < 1 year ago: 2<br>1-5 years ago: 13<br>5-10 years ago: 4                                                                                                                                   |
| <b>Patient or patient representative (number of participants in each group)</b> | Patient: 4<br>Patient carer or family member: 15                                                                                                                                            |
| <b>Employment status</b>                                                        | Full-time: 5<br>Unemployed: 2<br>Retired: 4<br>Full-time carer: 2<br>Unable to work due to disability: 6                                                                                    |

## Patient and public involvement

Patient representatives were involved and commented on the design of this study. The interview guide, questions and prompts were reviewed by a patient representative and updates were made following review. A preliminary report was circulated to participants and their feedback used for

1  
2  
3 additional validation. This ensured credibility and that participants recognised and accepted the  
4 themes identified in this paper. Third sector organisations who support patients and families shared  
5 our call for participants (see acknowledgements). A preliminary copy of the study findings was shared  
6 with participants and they were given the opportunity to comment on the findings.  
7  
8

### 9 10 **Research team and reflexivity**

11 Three researchers (JM, MF, MM) who are experienced in qualitative interviewing completed the  
12 telephone interviews. JM is a Principal Educator within NHS Education for Scotland and registered  
13 occupational therapist, MF is a reviewer with Healthcare Improvement Scotland and registered nurse,  
14 MM is a senior reviewer within Healthcare Improvement Scotland. JM and KG (a Critical Care  
15 doctor) independently coded the transcripts of interviews. Wider members of the research team had  
16 the opportunity to read interview transcripts and commented on cross-sectional analysis and  
17 agreement of themes.  
18  
19

### 20 21 22 **Research ethics approval**

23 This study involves human participants and was approved by the West of Scotland Research Ethics  
24 Service REC ref no: 21/WS/0048 IRAS ID 297720. Ethical principles were followed as outlined in  
25 the Medical Research Council's 'Principles and guidelines of good research practice'<sup>17</sup>. As part of  
26 this approval, each participant received a written participant information sheet, advising that  
27 participation was voluntary and assuring the person that they could decline to answer any question  
28 that they felt uncomfortable with and they were at liberty to withdraw at any time without  
29 consequence. Informed written consent was obtained before participants were enrolled in the study  
30  
31  
32

### 33 34 **Data management and analysis**

35 Semi-structured telephone interviews, lasting between 60 and 90 minutes, explored participants'  
36 experience of the adverse review process and their perceptions of what 'good' patient and family  
37 involvement would look like. Audio recordings were transcribed verbatim and stored and analysed  
38 using Nvivo 1.5.1 software. Interpretative phenomenological analysis (IPA) allowed exploration of  
39 individuals' lived experience and how they make sense of this<sup>16</sup>. Transcripts were analysed using the  
40 'inductive thematic analysis' technique described by<sup>15</sup>. This six-step process involves familiarisation  
41 with the data reading and re-reading the transcript, generation of initial codes, identifying themes,  
42 refining and reviewing themes and naming themes. The transcripts were coded independently by two  
43 authors (JM and KG). New themes were added as they emerged during the subsequent analysis of  
44 transcripts. Resulting themes and the point at which data saturation became apparent were discussed.  
45 Emergent themes were then shared with the study team and agreement of final themes was reached. A  
46 preliminary report was circulated to participants and their feedback used for additional validation.  
47 This ensured credibility and that participants recognised and accepted the themes identified in this  
48 paper. Study methods utilised the Consolidated Criteria for Reporting Qualitative Research guideline  
49  
50  
51  
52

### 53 54 **Results**

55 The four themes derived from the data analysis are highlighted in Table 2 and illustrated further by  
56 narrative quotes and discussion of congruent and diverse views amongst participants.  
57  
58  
59  
60



Table 2: Super-ordinate themes and subthemes

| Super-ordinate theme                                                                                            | Subthemes                                                                                                                             |
|-----------------------------------------------------------------------------------------------------------------|---------------------------------------------------------------------------------------------------------------------------------------|
| <b>Communication: the importance of feeling listened to and included</b>                                        | Being listened to, a person-centred approach, receiving an apology, feeling included, reconciliation                                  |
| <b>Trauma: the challenges experienced during the review process</b>                                             | Review processes were lengthy, frustrating, exhausting, negative effect on mental health                                              |
| <b>Learning: the importance of demonstrating change, and improving the healthcare system and patient safety</b> | Closing the loop, systems thinking, addressing safety and how to improve the system or processes that contributed to the safety event |
| <b>Litigation: the opportunity to get answers where it was difficult to obtain answers elsewhere</b>            | Getting answers, assurance, litigation being a last resort where answers were not obtained elsewhere                                  |

### Theme 1: Communication - the importance of feeling listened to and included

Being listened to, feeling heard and having a person-centred approach where people felt included was important for participants during review processes. The style and method of communication and asking what really mattered to that person or their family was highly valued. There was direct contrast between those who perceived the communication personable with those who felt the communication style didn't consider their needs and preferences. Use of the word 'statistic' and the focus on provision of a leaflet as opposed to dialogue in the excerpt below indicates lack of person-centred approach in some review experiences:

*'The lack of communication led us to feel like a statistic rather than a person. It was such an impersonal approach'* (participant 4).

Participants spoke about not being given the opportunity to discuss their individual circumstances and what happened. Instead, they were given a procedurally focused approach such as being issued with a leaflet or other type of standardised response echoed in the next excerpt below:

*'she said "we've decided that we're going to do...a serious adverse incident review-...and that I'm going to send you a leaflet"; no communication, no time to explain, we'll just send you a leaflet-... I've just lost my son..... we'll send you a leaflet, it didn't feel helpful at all'* (participant 8).

The human side of communication, asking about peoples' preferences, including them in the process with timely person-centred dialogue, was overwhelmingly important. The extract below demonstrates how the lack of this led to feelings of helplessness, frustration and even anger:

*'I was never asked about what mattered to me or what type of method of communication worked best. If they had, they'd have known I wasn't interested in the serious adverse event review, their long-winded report, or monetary compensation, I just wanted answers and to move on.'* (participant 18)

An excerpt from another participant adds to the perspective on how involving patients or their family in the review could help to support learning:

*'Perhaps have a bit more thought about how families should be engaged with might only need a short conversation, is there anything we need to know? Anything over and above what we have gathered that we [the NHS] need to know? They would have been able to gather from us very quickly that these are the key risks. I think that they could have drawn a lot more information from us [family] but basically that is lost because it is all very transactional - here is the response, this is what we are*

doing' (participant 12).

In contrast, participants who felt included and listened to felt more confident about the safety of the healthcare system and were more satisfied:

*'I was heard, and it made me feel safe going forward in the future because I'm likely to have this (medical issue) again and I'm likely to be seen (by that healthcare professional) again.... So, it made me feel incredibly safe, it made me feel heard. And it was like, actually, that's all I want, that's all I need to feel safe going forward'* (participant 5)

Speaking with and including patients and their families in a compassionate way, as illustrated in the excerpt below, helped and was almost restorative following the traumatic loss of a baby:

*'Our communication with the consultant...was really good....because she was being like a human being, a women who's a mother herself and she kind of slightly stepped back from her professional role and just spoke to you like an adult...it made us feel good because we knew she cared'* (participant 17).

## Theme 2: Trauma – the challenges experienced during the review process

This theme represents the challenges patients and their families experienced with the review or process. Participants reflected on the length of time it took for the review process to be completed. In the narrative below perceived inactivity during a lengthy review could impact negatively on mental health and lead to feelings of frustration and anxiety. Not being offered answers or a timely explanation contributed to negative views and impacted on wellbeing during what were already challenging times.

*'We are drawing this [the review] out longer and longer and longer. And I have to be careful, I don't drown myself in this whole process...I shouldn't have to sacrifice my own health and wellbeing just to get answers'-* (participant 8).

Participants spoke of the long time it sometimes took review processes and the importance of timely communication and the frustration and the hurt when timescales were missed:

*'I just wanted it to be over because it was quite stressful. I mean, they made a big mistake, lots of mistakes, and there wasn't an end to it for me, it was just dragging on-'* (participant 2).

Whilst in many cases an initial response appeared to be rapid, the subsequent provision of information was sometimes lacking and this led to frustration and submission of a complaint:

*'And within two weeks of putting in a complaint, I did have a meeting with the associate medical director. But after that, it seemed to me really slow and took almost two years...which is a long time to have it hanging over you. So, there was a lot of time between these meetings and letters where nothing was happening-'* (participant 2).

One participant spoke about the lengths that they had gone to convey their experience following the death of a family member by writing a detailed letter. The lack of response led to anxiety and added to the trauma experienced:

*'Well, it just didn't feel great [the NHS response]. Since then I have really thought about how the NHS responded to my letter...I had taken time over the time-line ....every single word I poured over and*

1  
2  
3 *thought about because I wanted to present my situation and the things I felt wasn't right....., my*  
4 *language was very careful, so a week later, not to have received anything, every day I thought, when*  
5 *am I going to hear? I was nervous. I just wanted to hear back... my expectations were to receive*  
6 *something. So, to get nothing and then to have to write again it just felt like adding insult to injury:-'*  
7 *(participant 3).*

8  
9  
10 When timeframes were missed or extended this often led to a negative perception of the review  
11 process and additional stress and dissatisfaction:-

12  
13 *'It's terrible...they sent an email saying that they want more time. They don't even tell you how much*  
14 *more time they want, it's frustrating. They initially offered a date.... but then, you know, that passed*  
15 *and no timescale of when they think they will have it looked at. It was just very much...open-ended:-'*  
16 *(participant 1).*

17  
18 Feelings of frustration and anger resonated through many of the interviews when follow-up  
19 communication did not occur. When there was no response to questions asked this could lead to  
20 suspicions of a cover-up and led participants to wonder if the service was hiding something.

21  
22 *'The scary bit is I am going to start laying the blame at them. And that was never the purpose of my*  
23 *questions. It was for my own satisfaction that I want to know that things were being done. But now I'm*  
24 *beginning to feel things were not done, and there was negligence going on:-'* (participant 8).

25  
26 Overwhelmingly, how the communication happened (or in some cases did not happen), and the  
27 timeframes involved were important to participants and are reflected on in the third theme, Learning.

### 30 **Theme 3: Learning – the importance of closing the loop, and improving the healthcare system** 31 **and patient safety**

32  
33  
34 Closely linked to the earlier theme of communication and involvement is learning; this was important  
35 to all participants. Lack of engagement with patients and families contributed to fear of missed  
36 opportunities for improvement in the healthcare system and the same adverse event occurring to other  
37 patients. Although an apology was important, it was important to many participants that they knew  
38 what changes had been made following the adverse event:-

39  
40 *'in terms of proper engagement....-it would have been good to see what actually changed as a result*  
41 *...we don't know, and we will never know, actually, because the complaint was closed at that point*  
42 *because essentially we were satisfied that the complaint was upheld'* (participant 12).

43  
44 Again, the procedural nature of the response was spoken about with limited evidence of improvement:

45  
46 *'They just basically ticked the box, apologised for everything, upheld everything, and then it's like no*  
47 *further action. I can just file that. That's what I kind of feel because having gone back into the*  
48 *hospital, I don't particularly see that there's been much change'* (participant 12).

49  
50  
51 This excerpt and the one that follows highlighted participants experience of some parts of the  
52 healthcare system which may not have prioritised learning and improvement. This was disappointing  
53 for participants, many who had experienced the loss of a loved one or significant harm themselves.  
54 The overwhelming intention was to lessen the chance of something similar happening to others. The  
55 excerpts below highlights instances where the healthcare system did not lend itself to these changes:

56  
57 *'complaining...gets me nowhere, people shut down, notes go missing, people close ranks. And then*  
58 *you're not heard, and you're not believed and actually they put the blame on me and say, oh, no,*  
59 *you're paranoid or whatever. I've had the whole works and also ...people are only human, we're*  
60

1  
2  
3 *dealing with human beings that are stressed out often' (participant 5).*  
4

5 In these excerpts participants focus on the healthcare system, the pressure staff could be under and the  
6 importance of learning and not blaming individuals, although it was interesting that in the excerpt  
7 below a senior leader in healthcare suggested greater individual responsibility:  
8

9 *'I suppose there is anger with me as well, but it's just the system is not working, it's broken and I'm*  
10 *just very frustrated and I think as I said to them (the chief executive), I'm not looking to put anybody's*  
11 *head on the block here. It's a system that's not functioning properly. It was also pointed out to me that*  
12 *there is individual responsibility to make the system work and if people are not taking individual*  
13 *responsibilities properly then it's not going to work' (participant 8).*  
14

15 Participants recognised the strain the healthcare system is under and the potential for human error,  
16 and, in the excerpt above, apportioning blame was not the intention, but the participant appears to  
17 suggest that in one instance a senior leader within healthcare was focused on 'individual  
18 responsibility' as opposed to a more system-based approach:  
19

20  
21 *'I wasn't looking for anybody and I am still not. My philosophy in life is that people make mistakes,*  
22 *we are all human and we make mistakes. Things are not going to work unless they (the health service)*  
23 *listen and then implement some sort of action' (participant 8).*  
24

#### 25 26 27 **Theme 4: Litigation – the opportunity to get answers where it was difficult to obtain answers** 28 **elsewhere**

29  
30 Overall, where participants did not feel included, listened to and supported in a compassionate way, or  
31 where the service did not evidence there had been learning, or there was a lack of feedback and  
32 timely communication, this increased the likelihood of seeking legal advice.  
33

34 Seeking compensation was never the original intention of any of the participants, as evidenced in the  
35 excerpt below. Learning mattered more with litigation being an absolute last resort and used only  
36 when attempts to get answers and improvement had not been successful:  
37

38 *'Right from the very beginning, people had said to go straight to a solicitor, but I didn't want to do*  
39 *that. I wanted just to make sure it never happens to anybody else. However, in the end, I thought that*  
40 *I've got nowhere, I really don't feel that they are taking much responsibility, so I just decided I would*  
41 *take it further' (participant 15).*  
42

43 This is echoed by another participant who states:  
44

45 *'I went two years and nine months without ever wanting compensation, and I've made that very clear*  
46 *from day one that was never my goal and I didn't want to profit (from the death of my loved one). But*  
47 *I decided to do this because I was being ignored and I knew that I'd get a reaction' (participant 13).*  
48

49  
50 Some participant's narratives focused on how the lack of inclusion forced them to seek legal advice,  
51 with their perception that healthcare services appeared concerned about the potential for blame;  
52 litigation was used as a method to encourage engagement and get answers:  
53

54  
55 *'I just feel that the medical profession is so scared of being sued that it closes down...if they listened*  
56 *to people, and tried to rectify the mistakes, in a way that people actually wanted, there would be -less*  
57 *compensation and it's less confrontational' (participant 5).*  
58

59 Within this theme, participants appear to outline how a more inclusive approach would not only be  
60 restorative for them it could be less adversarial for all involved with the potential to reduce litigation

claims.

This participant recalled their personal experience with use of the word ‘scared’ indicative of how those in the health service appeared:

*‘I’ve had medical records go missing when I put in a formal complaint. I think people are scared of being sued and don’t want to take accountability. I think the NHS is so scared of being sued and it needs to get over it actually, we need to own up, we need to own our mistakes’, actually people want less money, not more. And it takes a lot less time for the NHS than going through the courts and you’d pay the lawyers a lot less.’ (participant 5).*

## Discussion

Findings from this study expand our understanding on patient and family experience and their perceptions of what ‘good’ patient and family involvement in adverse event reviews might look like. The interrelated themes depict the participants’ views on challenges with communication, lack of involvement and the importance of listening to what matters to them. During the qualitative interviews participants spoke freely on their experiences around lack of personalised communication and limited inclusion in the review process. This led to frustration and impacted on their wellbeing with some stating the only way to get answers was to force this through litigation. These findings concur with similar work in the Netherlands focused on suicide reviews<sup>6</sup> and a UK based study on parental engagement following perinatal mortality<sup>8</sup> where better inclusion of patients and families supported reconciliation, learning and reduced the likelihood of litigation<sup>7</sup>. Similarly a mental welfare survey found almost two-thirds of carers and families felt their views were not sufficiently taken into account following death of a family member whilst under a compulsory treatment order<sup>19</sup>.

Participants illustrated the review process was long and arduous and added to an already traumatic event. Participants suggested the following aspects, which if enacted, could make a real difference. Timely person-centred communication, early involvement inviting patients and their families to provide additional information to complement the review undertaken by health-care professionals, with their contributions offering a further opportunity to enhance learning. Patients and their family will experience the event from a different perspective and potentially have valuable information on the systems and processes leading up to the event. Communication which focused on what matters to the patient or family should feel inclusive and not a procedural or tick box exercise. Crucial to participants satisfaction was ‘closing the loop’ (proving to patients and family that you have heard their feedback and are taking it seriously) demonstrating consideration of changes to healthcare systems and services to lessen the likelihood of recurrence with future patients. Interestingly much of this concurs and builds on previous studies<sup>20</sup> and legislative ‘Duty of Candour’<sup>21</sup> where patients who experience harm during the provision of their healthcare are offered an explanation, an apology, and informed of changes made to prevent future incidents<sup>12</sup>. Our findings suggest participants would like the opportunity to feel more engaged in adverse event reviews going forward.

A limitation of our study is that there was likely recruitment bias: most participants who responded to this study had a negative experience during adverse review processes and there may be patients and families who have had positive experiences but were less likely to share these. Nevertheless, the study provides very valuable insights and experiences which we hope will inform future improvements in adverse event review processes.

Whilst much has been achieved in the field of co-production, person-centred care, involving people in healthcare decision-making more widely, including the patient in patient safety remains an issue<sup>22</sup>. That said, the impact of an adverse event differs from most other healthcare interactions. Patients have been harmed, unintentionally, by the people or healthcare system in which they placed considerable

1  
2  
3 trust, so their reaction may be especially powerful. This may require particular conditions within the  
4 healthcare system and specific skills and competencies for healthcare staff. There are some examples  
5 where it is beneficial to both patients and healthcare staff of patient involvement in learning from  
6 when things go wrong in healthcare<sup>23</sup>. A barrier to the openness and learning required to improve  
7 safety relates to perceptions around the healthcare system or professionals fear of being blamed,  
8 reputational damage, negative media coverage and litigation<sup>24, 25</sup>. Tackling this requires the fostering  
9 of a 'just culture' where frontline staff feel able to explain conditions that contributed to the adverse  
10 event, and able to report mistakes within a health system focused on improvement and learning where  
11 individuals are not held accountable for system failings<sup>26,27</sup>. True psychological safety perhaps  
12 requires some fundamental cultural changes if true just culture and candour are to be realised patients,  
13 families and staff. Whilst this and other publications have now documented a clear direction of travel  
14 for inclusion of patients in patient safety, the focus should now firmly be on creating the conditions  
15 for openness and learning. We suggest that this focus should be on promoting culture change,  
16 psychological safety, systems thinking, exploring opportunities for guidance, training and support for  
17 governance leads, clinicians, senior leaders and risk management staff to fully enact the personalised  
18 approach outlined by the participants in this study.  
19  
20  
21  
22

### 23 **Conclusions/Key findings**

24  
25  
26 This study illustrates what matters to patients and families using their suggestions to discuss  
27 improvement in practice. It adds detail on how best to enact this inclusion within adverse event  
28 reviews. Findings suggest that an open, collaborative, person-centred approach which listens to, and  
29 supports, people following an adverse event results in better outcomes for all. For the patient or their  
30 family, it can help restore their faith in the healthcare system and reassure them that learning gained  
31 may lessen the chance of similar events happening to others. For the health service, not listening to  
32 people risks missing vital learning which could improve future patient safety and quality of care.  
33 Engaging patients and families in reviews and communicating in a compassionate manner could also  
34 decrease litigation claims. Personalised conversations, a streamlined review process, focused on the  
35 healthcare system and circumstances around the event with open engagement to enhance learning  
36 were what mattered most to our participants.  
37  
38

### 39 **Funding**

40  
41  
42 The joint commission for safety, openness and learning, where this study originated, is committed to  
43 understanding patient and family perspectives. This study is part of a larger programme of work being  
44 undertaken by NHS Education for Scotland (NES) and Healthcare Improvement Scotland (HIS) on  
45 behalf of the Scottish Government.  
46

### 47 **Acknowledgements**

48  
49 The authors are very grateful to all patients and family members who volunteered their time, shared  
50 their experience and contributed to this greater understanding of patient and family engagement  
51 during adverse event review processes. The authors are also very grateful to Helen Munro our patient  
52 representative and to those who volunteered to review the interview schedule and commented on  
53 earlier drafts of this manuscript. Thank you to third sector partners and organisations for their support  
54 with recruitment (care opinion, alliance, parkinsons society, sepsis trust, support in mind, penumbra,  
55 breast cancer now, prostate cancer Scotland, Lauren Currie twilight foundation, British liver trust,  
56 diabetes UK, SANDS, polly cystic ovary charity UK).  
57  
58

59 **Data availability statement:** No data are available  
60

1  
2  
3 **Ethics approval:** This study involves human participants and was approved by the West of Scotland  
4 Research Ethics Service REC ref no: 21/WS/0048 IRAS ID 297720  
5

6 **Contributions:** JM designed the study, carried out data collection, analysed, interpreted and the  
7 drafted the paper. KG carried out data collection, analysed, interpreted, and reviewed draft  
8 manuscript. MM carried out data collection and reviewed draft paper. MF carried out data collection.  
9  
10  
11  
12  
13  
14  
15  
16  
17  
18  
19  
20  
21  
22  
23  
24  
25  
26  
27  
28  
29  
30  
31  
32  
33  
34  
35  
36  
37  
38  
39  
40  
41  
42  
43  
44  
45  
46  
47  
48  
49  
50  
51  
52  
53  
54  
55  
56  
57  
58  
59  
60

For peer review only

## References

1. WHO. World Alliance for Patient Safety, World Health Organisation Geneva: 2012  
[https://www.who.int/patientsafety/en/brochure\\_final.pdf](https://www.who.int/patientsafety/en/brochure_final.pdf)
2. Rathert C, Brandt J, Williams ES. Putting the ‘patient’ in patient safety: a qualitative study of consumer experiences. *Health Expect*. 2012;**15**: 327-33
3. Wiig S, Haraldseid-Driftland C, Tvette Zachrisen R, *et al*. Next of kin involvement in regulatory investigations of adverse events that caused patient death: a process evaluation (Part I - the next of kin's perspective). *J Patient Saf*. 2021;**17**: e1713-e1718.
4. Cumberlege J. First do no harm: the report of the independent medicines and medical devices safety review. 2020. Available at: [https://www.immdsreview.org.uk/downloads/IMMDSReview\\_Web.pdf](https://www.immdsreview.org.uk/downloads/IMMDSReview_Web.pdf)
5. Ockeden D. Emerging findings and recommendations from the independent review of maternity services at the Shrewsbury and Telford Hospital NHS Trust. 2020. Available at: [https://assets.publishing.service.gov.uk/government/uploads/system/uploads/attachment\\_data/file/943011/Independent\\_review\\_of\\_maternity\\_services\\_at\\_Shrewsbury\\_and\\_Telford\\_Hospital\\_NHS\\_Trust.pdf](https://assets.publishing.service.gov.uk/government/uploads/system/uploads/attachment_data/file/943011/Independent_review_of_maternity_services_at_Shrewsbury_and_Telford_Hospital_NHS_Trust.pdf)
6. Bouwman R, de Graaff B-, de Beurs D-, *et al*. Involving patients and families in the analysis of suicides, suicide attempts, and other sentinel events in mental healthcare: a qualitative study in the Netherlands. *Int J Environ Res Public Health* 2018;**15**: 1104.
7. Moore J, Bismark M, Mello MM. Patients’ experiences with communication and resolution programs after medical injury. *JAMA Intern Med*. 2017;**177**: 1595-1603.
8. Bakhbaki D, Burden C, Storey C, *et al*. PARENTS 2 Study: a qualitative study of the views of healthcare professionals and stakeholders on parental engagement in the perinatal mortality review—from ‘bottom of the pile’ to joint learning. *BMJ Open* 2018;**8**: e023792.
9. Moore J, Mello MM. Improving reconciliation following medical injury: a qualitative study of responses to patient safety incidents in New Zealand [published online March 9, 2017]. *BMJ Qual Saf*. doi:10.1136/bmjqs-2016-005804
10. O’Connor E, Coates HM, Yardley IE, *et al*. Disclosure of patient safety incidents: a comprehensive review. *Int J Qual Health Care*. 2010;**22**: 371-9.
11. Iedema R, Sorensen R, Manias E, *et al*. Patients’ and family members’ experiences of open disclosure following adverse events. *Int J Qual Health Care* 2008;**20**: 421-32.
12. Vincent CA, Coulter A. Patient safety: what about the patient? *Qual Saf Health Care* 2002;**11**: 76–80.
13. Merner B, Hill S, Taylor M. “I’m trying to stop things before they happen”: carers’ contributions to patient safety in hospitals. *Qual Health Res* 2019;**29**: 1508-18.
14. Health Improvement Scotland. Building a national approach to learning from adverse events through reporting and review: a national framework for Scotland 2019. Available at: <file:///C:/Users/jeanm/OneDrive%20-%20NHS%20Scotland/Documents/PCC%20Master%20File/2.0%20CEIM/11.0%20Communication/20191216-AE-framework-4th-Edition.pdf>



15. Braun V, Clarke V. Using thematic analysis in psychology. *Qual Res Psychol* 2006;**3**: 77-101.
16. Smith JA, Flower P, Larkin M. Interpretative Phenomenological Analysis: Theory, Method and Research. London: Sage. 2009.
17. Medical Research Council. Principles and guidelines for good research practice. 2021. Available at: <https://www.ukri.org/publications/principles-and-guidelines-for-good-research-practice/>
18. Tong A, Sainsbury P, Craig J. Consolidated criteria for reporting qualitative research (COREQ): a 32-item checklist for interviews and focus groups. *Int J Qual Health Care* 2007;**19**: 349-57.
19. Mental Welfare Commission for Scotland. Deaths during compulsory treatment orders survey 2021: <https://www.gov.scot/publications/review-arrangements-investigating-deaths-patients-being-treated-mental-disorder/pages/4/>
20. van Dael J, Reader TW, Gillespie A, *et al.* Learning from complaints in healthcare: a realist review of academic literature, policy evidence and front-line insights. *BMJ Qual Saf* 2020;**29**: 684-95.
21. Professional Standards Authority. Telling patients the truth when something goes wrong: Evaluating the progress of professional regulators in embedding professionals' duty to be candid to patients. 2019. Available at: [https://www.professionalstandards.org.uk/docs/default-source/publications/research-paper/telling-patients-the-truth-when-something-goes-wrong---how-have-professional-regulators-encouraged-professionals-to-be-candid-to-patients.pdf?sfvrsn=100f7520\\_6](https://www.professionalstandards.org.uk/docs/default-source/publications/research-paper/telling-patients-the-truth-when-something-goes-wrong---how-have-professional-regulators-encouraged-professionals-to-be-candid-to-patients.pdf?sfvrsn=100f7520_6)
22. Berger Z, Flickinger TE, Pfoh E, *et al.* Promoting engagement by patients and families to reduce adverse events in acute settings: a systematic review. *BMJ Qual Saf* 2014;**23**: 548-55.
23. Myren BJ, Hermens RRPMG, Koksmas JJ, *et al.* Openness to new perspectives created by patient participation at the morbidity and mortality meeting. *Patient Educ Couns* 2021;**104**: 343-51.
24. Reynolds T. Openness is catching. 2014. Available at: <https://gmcuk.wordpress.com/2014/12/18/openness-is-catching/>
25. Radhakrishna S. Culture of blame in the National Health Service; consequences and solutions. *Br J Anaesth* 2015;**115**: 653-5.
26. Foslien-Nash C, Reed b. Just Culture IS not 'Just' Culture – It's shifting mindset. *Military Medicine*, 185, S3:52.
27. McNab D, Bowie P, Ross A, Morrison J. Understanding and responding when things go wrong: key principles for primary care educators. *Education for primary care* 2016 27:4p258-266

1  
2  
3  
4  
5  
6  
7  
8  
9  
10  
11  
12  
13  
14  
15  
16  
17  
18  
19  
20  
21  
22  
23  
24  
25  
26  
27  
28  
29  
30  
31  
32  
33  
34  
35  
36  
37  
38  
39  
40  
41  
42  
43  
44  
45  
46  
47  
48  
49  
50  
51  
52  
53  
54  
55  
56  
57  
58  
59  
60

For peer review only

**Appendix One: Semi-structured interview questions**

- 1) **Are you the person involved in the incident or a representative or family member?**
- 2) **Can you tell me a bit about the NHS response to the patient safety event either you or your family member was involved in? Thinking about the event, can you tell me what helped and what could have been better in the response.**
- 3) **Did you feel listened to and included? Were you asked about what was important to you? Were you given the chance to talk about how you felt about the safety event and how it affected you? What helped and what didn't?**
- 4) **What about the explanation you received from the NHS regarding the event, how would you describe this? Was it in a format that was accessible to you/ written in plain English? How was the information shared – e mail, letter, face to face What helped and any improvements you think could be made? Were all your questions answered?**
- 5) **In what ways were the medical and nursing staff involved in the process? Did they speak to you, was this or would this have been helpful?**
- 6) **What about the communication or apology you received? How would you describe this? What helped or did not?**
- 7) **Which parts of the response/actions taken by the NHS help with your emotional healing and reconciliation? Are there any other organisations/support groups you would recommend which were helpful to you?**
- 8) **Did you get the opportunity to contribute or comment on the learning from the event? What form did this take? Were you able to share how you felt and how this event had affected you? Was this helpful? Would this have been helpful?**
- 9) **Is there anything else we have not spoken about that you feel would be helpful for me to know?**

# BMJ Open

## Adverse event reviews in healthcare: What matters to patients and their family? A qualitative study exploring the perspective of patients and family.

|                                 |                                                                                                                                                                                                                                                                                                                            |
|---------------------------------|----------------------------------------------------------------------------------------------------------------------------------------------------------------------------------------------------------------------------------------------------------------------------------------------------------------------------|
| Journal:                        | <i>BMJ Open</i>                                                                                                                                                                                                                                                                                                            |
| Manuscript ID                   | bmjopen-2021-060158.R1                                                                                                                                                                                                                                                                                                     |
| Article Type:                   | Original research                                                                                                                                                                                                                                                                                                          |
| Date Submitted by the Author:   | 31-Mar-2022                                                                                                                                                                                                                                                                                                                |
| Complete List of Authors:       | McQueen, Jean M; NHS Education for Scotland West Region, Person Centred Care<br>Gibson, Kyle; Royal Infirmary of Edinburgh, Intensive Care<br>Manson, Moira; Healthcare Improvement Scotland Glasgow, Assurance<br>Francis, Morag; Healthcare Improvement Scotland, scrutiny                                               |
| <b>Primary Subject Heading</b>: | Communication                                                                                                                                                                                                                                                                                                              |
| Secondary Subject Heading:      | Health services research, Patient-centred medicine                                                                                                                                                                                                                                                                         |
| Keywords:                       | Health & safety < HEALTH SERVICES ADMINISTRATION & MANAGEMENT, Clinical governance < HEALTH SERVICES ADMINISTRATION & MANAGEMENT, Adverse events < THERAPEUTICS, Quality in health care < HEALTH SERVICES ADMINISTRATION & MANAGEMENT, Risk management < HEALTH SERVICES ADMINISTRATION & MANAGEMENT, QUALITATIVE RESEARCH |
|                                 |                                                                                                                                                                                                                                                                                                                            |

SCHOLARONE™  
Manuscripts



I, the Submitting Author has the right to grant and does grant on behalf of all authors of the Work (as defined in the below author licence), an exclusive licence and/or a non-exclusive licence for contributions from authors who are: i) UK Crown employees; ii) where BMJ has agreed a CC-BY licence shall apply, and/or iii) in accordance with the terms applicable for US Federal Government officers or employees acting as part of their official duties; on a worldwide, perpetual, irrevocable, royalty-free basis to BMJ Publishing Group Ltd ("BMJ") its licensees and where the relevant Journal is co-owned by BMJ to the co-owners of the Journal, to publish the Work in this journal and any other BMJ products and to exploit all rights, as set out in our [licence](#).

The Submitting Author accepts and understands that any supply made under these terms is made by BMJ to the Submitting Author unless you are acting as an employee on behalf of your employer or a postgraduate student of an affiliated institution which is paying any applicable article publishing charge ("APC") for Open Access articles. Where the Submitting Author wishes to make the Work available on an Open Access basis (and intends to pay the relevant APC), the terms of reuse of such Open Access shall be governed by a Creative Commons licence – details of these licences and which [Creative Commons](#) licence will apply to this Work are set out in our licence referred to above.

Other than as permitted in any relevant BMJ Author's Self Archiving Policies, I confirm this Work has not been accepted for publication elsewhere, is not being considered for publication elsewhere and does not duplicate material already published. I confirm all authors consent to publication of this Work and authorise the granting of this licence.

**Title:** Adverse event reviews in healthcare: What matters to patients and their family? A qualitative study exploring the perspective of patients and family.

**Author Names:** Dr Jean McQueen <sup>1</sup>, Dr Kyle Gibson <sup>2</sup>, Moira Manson <sup>3</sup>, Morag Francis <sup>3</sup>

*Authors or their employer 2021: <sup>1</sup> NHS Education for Scotland <sup>2</sup> NHS Lothian <sup>3</sup> NHS Healthcare Improvement Scotland*

**Corresponding author:** [jean.mcqueen2@nhs.scot](mailto:jean.mcqueen2@nhs.scot)

## **Abstract:**

**Objectives:** Explore what ‘good’ patient and family involvement in healthcare adverse event reviews may involve.

**Design:** Data was collected using semi-structured telephone interviews. Interview transcripts were analysed using an inductive thematic approach.

**Setting:** NHS Scotland.

**Participants:** 19 interviews were conducted with patients who had experienced an adverse event during the provision of their healthcare, or their family member.

**Results:** Four key themes were derived from these interviews: trauma, communication, learning and litigation.

**Conclusions:** There are many advantages of actively involving patients and their families in adverse event reviews. An open, collaborative, person-centred approach which listens to, and involves, patients and their families is perceived to lead to improved outcomes. For the patient and their family, it can help with reconciliation following a traumatic event and help restore their faith in the healthcare system. For the health service, listening and involving people will likely enhance learning with subsequent improvements in healthcare provision with reduction in risk of similar events occurring for other patients. Communicating in a compassionate manner could also decrease litigation claims following an adverse event. This study suggests eight recommendations for future practice an open, collaborative process which includes an apology, involving the patient and family in the review, appropriate timing, person-centred compassionate communication, redressing the power imbalance, closing the loop by communicating the learning and sharing what steps are being considered to help prevent recurrence.

## **Strengths and limitations of this study**

- This study provides a valuable insight, adding new knowledge to enhance our understanding of what ‘good’ patient and family involvement in adverse event reviews looks like from the perspectives of patients and families themselves.
- In-depth qualitative interviews contributed rich material giving insights into patient and family experience of the adverse event review process and how listening and involving people will likely enhance learning.
- There is a risk of bias most participants who responded to this study had a negative experience during adverse review processes and there may be patients and families who have had positive experiences but were less likely to share these.

1  
2  
3  
4  
5  
6  
7  
8  
9  
10  
11  
12  
13  
14  
15  
16  
17  
18  
19  
20  
21  
22  
23  
24  
25  
26  
27  
28  
29  
30  
31  
32  
33  
34  
35  
36  
37  
38  
39  
40  
41  
42  
43  
44  
45  
46  
47  
48  
49  
50  
51  
52  
53  
54  
55  
56  
57  
58  
59  
60

- Although this study was conducted in Scotland, we suggest the knowledge generated will be of value to other health care systems.

For peer review only

## Introduction

Patients and consumers of health care should be at the very centre of the quest to improve patient safety. A major element of programmes designed to improve patient safety, is having the capacity and capability to capture comprehensive information on safety events, errors and near-misses so this can be used as a source of learning, and as the basis for preventive action in the future<sup>1</sup>. Involvement of patients and families in reviews may reveal additional information (which is not currently being captured in some healthcare systems) which could enhance learning, assist with a person-centred approach, and support patients and families with reconciliation after adverse events<sup>2,3</sup>. Organisations which represent patient voices and national enquiries highlight the lack of involvement of patients in Significant Adverse Event Reviews (SAERs) and a culture which often discounts or does not fully incorporate information highlighted by patients and families<sup>4,5</sup>. When things go wrong in healthcare, patients and their families frequently have valuable information which could enhance learning for the healthcare system<sup>1</sup>. They may have additional contextual knowledge, which will support the health service as they devise steps that can be taken to minimise recurrence<sup>6</sup>. On the other hand, poor involvement of patients and families can lead to worsening psychological distress and increased likelihood of complaints and litigation claims<sup>7 8 9 10 11 12</sup>. Whilst the NHS strives to provide safe and effective person-centred care, there is a lack of research focused on how this patient family involvement should be enacted and reflected in adverse event reviews<sup>13</sup>. This study explores the perspectives and experiences of patient and family engagement during adverse event reviews in NHS Scotland, building on previous research with eight recommendations.

## Current Practice and Research

Within NHS Scotland an adverse event is an event that could have caused (a near miss), or did result in, harm to people or groups of people<sup>14</sup>. The current adverse event review process dictates that patients, service users and their families are told what went wrong, why and receive an apology for any harm that has occurred<sup>14</sup>. Involvement of patients and their family varies with little detail on how best to enact person-centred engagement. In some cases, patients and families are invited to submit questions in advance of the review, whilst in others patients and families may be provided with a copy of the review findings. Less frequently are they invited to share their observations surrounding the event, what mattered (and matters) to them, and how their perspectives could enhance learning. This means their issues and concerns are not always fully known to healthcare managers, lost opportunity to address these, means the potential for vital learning could be missed. This study aims to enhance our understanding of what 'good' patient and family involvement looks like from the perspectives of patients and families themselves.

## Objective

Our objective was to explore patients and families' experience of involvement in adverse event reviews to understand what 'good' involvement may look like and suggest recommendations for improvement from a patient and family perspective.

## Methods

This study was explorative, using inductive thematic analysis' techniques<sup>15</sup>. Interpretative phenomenological analysis allowed exploration of individuals' lived experience and how they make sense of this<sup>16</sup>. Telephone interviews were chosen as the most convenient, accessible, cost effective option, affording our participants a greater degree of privacy and anonymity when compared with video calls or face to face interviews. The setting for our research was NHS Scotland as this study was supported by the Scottish government and our national adverse events network.



## Participant selection and recruitment

Recruitment and data collection was between June and November 2021. Recruitment used a variety of sources: advertisement on websites (callforparticipants.com and Care Opinion), the NHS Scotland Adverse Events Network, and a range of third sector non-government organisations. No incentives were offered for participation.

Inclusion criteria: participant or family member who experienced a serious health care incident/patient safety event in the last 10 years, resides in Scotland, are aged 18 years or over and speak English. An adverse event is defined as harm to a patient because of health care and includes medication errors, missed diagnosis, system or medical device failure, an unexpected event causing harm requiring additional treatment, or resulting in death or psychological trauma. Exclusion criteria for this study were patients and families where there was an ongoing investigation or litigation claim, adverse event did not occur within Scotland.

34 potential participants responded with interest and were sent further details by e-mail in the form of a Participant Information Sheet and Consent Form. Two participants were excluded as an adverse event review was not undertaken, 4 opted not to proceed and 9 did not reply to follow up emails. A convenience sample of 19 participants provided informed consent and took part in the study. Semi-structured telephone interviews (appendix 1) were conducted with patients or family members of patients who had experienced an adverse event in the last 10 years whilst receiving care from the NHS in Scotland. Each participant took part in one telephone interview which was digitally recorded and subsequently transcribed. Identifying features were removed to ensure confidentiality. Participant characteristics, including the nature of the adverse event, are summarised in Table 1.

**TABLE 1: Participant characteristics (n=19)**

|                                                                                 |                                                                                                                                                                                             |
|---------------------------------------------------------------------------------|---------------------------------------------------------------------------------------------------------------------------------------------------------------------------------------------|
| <b>Gender (number of participants)</b>                                          | <b>Female: 10</b><br><b>Male: 9</b>                                                                                                                                                         |
| <b>Age (number of participants in each age group)</b>                           | 35-44 years: 8<br>45-54 years: 4<br>>55 years: 7                                                                                                                                            |
| <b>Category of adverse event (number of participants in each group)</b>         | Adult death/palliative care: 7<br>Delayed diagnosis: 1<br>Fall: 1<br>Medication error: 1<br>Mental health: 3<br>Addiction: 1<br>Suicide: 1<br>Neonatal death: 2<br>Surgical complication: 2 |
| <b>Duration since adverse event (number of participants in each group)</b>      | < 1 year ago: 2<br>1-5 years ago: 13<br>5-10 years ago: 4                                                                                                                                   |
| <b>Patient or patient representative (number of participants in each group)</b> | Patient: 4<br>Patient carer or family member: 15                                                                                                                                            |

## Patient and public involvement

Patient representatives were involved and commented on the design of this study. The interview guide, questions and prompts were reviewed by a patient representative and updates were made following review. A preliminary report was circulated to participants and their feedback used for additional validation. This ensured credibility and that participants recognised and accepted the themes identified in this paper. Third sector organisations who support patients and families shared our call for participants (see acknowledgements). A preliminary copy of the study findings was shared with participants and they were given the opportunity to comment on the findings.

## Research team and reflexivity

JM a Principal Educator within NHS Education for Scotland and registered occupational therapist conceived the study. Three researchers (JM, MF, MM) who are experienced in qualitative interviewing completed the telephone interviews., MF is a reviewer with Healthcare Improvement Scotland and registered nurse, MM is a senior reviewer within Healthcare Improvement Scotland. JM and KG (a Critical Care doctor) independently coded the transcripts of interviews. Wider members of the research team had the opportunity to read interview transcripts and commented on cross-sectional analysis and agreement of themes.

## Research ethics approval

This study involves human participants and was approved by the West of Scotland Research Ethics Service REC ref no: 21/WS/0048 IRAS ID 297720. Ethical principles were followed as outlined in the Medical Research Council's 'Principles and guidelines of good research practice'<sup>17</sup>. As part of this approval, each participant received a written participant information sheet, advising that participation was voluntary and assuring the person that they could decline to answer any question that they felt uncomfortable with and they were at liberty to withdraw at any time without consequence. Informed written consent was obtained before participants were enrolled in the study

## Data management and analysis

Semi-structured telephone interviews, lasting between 60 and 90 minutes, explored participants' experience of the adverse event review process and their perceptions of what 'good' patient and family involvement would look like. Audio recordings were transcribed verbatim and stored and analysed using Nvivo 1.5.1 software. Interpretative phenomenological analysis (IPA) allowed exploration of individuals' lived experience and how they make sense of this<sup>16</sup>. Transcripts were analysed using 'inductive thematic analysis'<sup>15</sup>. This six-step process involves familiarisation with the data reading and re-reading the transcript, generation of initial codes, identifying themes, refining and reviewing themes and naming themes. The transcripts were coded independently by two authors (JM and KG). New themes were added as they emerged during the subsequent analysis of transcripts. Resulting themes and the point at which data saturation became apparent were discussed. Emergent themes were then shared with the study team and agreement of final themes was reached. A preliminary report was circulated to participants and their feedback used for additional validation. This ensured credibility and that participants recognised and accepted the themes identified in this paper. We utilised the Consolidated Criteria for Reporting Qualitative Research guideline<sup>18</sup>.

## Results

The four themes derived from the data analysis are highlighted in Table 2 and illustrated further by narrative quotes and discussion of congruent and diverse views amongst participants.

**Table 2: Superordinate themes and subthemes**

| Superordinate theme                                                                                             | Subthemes                                                                                                                             |
|-----------------------------------------------------------------------------------------------------------------|---------------------------------------------------------------------------------------------------------------------------------------|
| <b>Communication: the importance of feeling listened to and included</b>                                        | Being listened to, a person-centred approach, receiving an apology, feeling included, reconciliation                                  |
| <b>Trauma: the challenges experienced during the review process</b>                                             | Review processes were lengthy, frustrating, exhausting, had a negative effect on mental health                                        |
| <b>Learning: the importance of demonstrating change, and improving the healthcare system and patient safety</b> | Closing the loop, systems thinking, addressing safety and how to improve the system or processes that contributed to the safety event |
| <b>Litigation: the opportunity to get answers where it was difficult to obtain answers elsewhere</b>            | Getting answers, assurance, litigation being a last resort where answers were not obtained elsewhere                                  |

### Theme 1: Communication - the importance of feeling listened to and included

Being listened to, feeling heard and having a person-centred approach where people felt included was important for participants during the review processes. The style and method of communication and asking what really mattered to that person or their family was highly valued. There was direct contrast between those who perceived the communication personable with those who felt the communication style didn't consider their needs and preferences. Use of the word 'statistic' and the focus on provision of a leaflet as opposed to dialogue in the excerpt below indicates lack of person-centred approach in some review experiences:

*'The lack of communication led us to feel like a statistic rather than a person. It was such an impersonal approach' (participant 4).*

Participants spoke about not being given the opportunity to discuss their individual circumstances and what happened. Instead, they were given a procedurally focused approach such as being issued with a leaflet or other type of standardised response echoed in the next excerpt below:

*'she said "we've decided that we're going to do...a serious adverse incident review...and that I'm going to send you a leaflet"; no communication, no time to explain, we'll just send you a leaflet... I've just lost my son..... we'll send you a leaflet, it didn't feel helpful at all' (participant 8).*

The human side of communication, asking about peoples' preferences, including them in the process with timely person-centred dialogue, was overwhelmingly important. The extract below demonstrates how the lack of this led to feelings of helplessness, frustration and even anger:

*'I was never asked about what mattered to me or what type of method of communication worked best. If they had, they'd have known I wasn't interested in the serious adverse event review, their long-winded report, or monetary compensation, I just wanted answers and to move on'. (participant 18)*

An excerpt from another participant adds to the perspective on how involving patients or their family

1  
2  
3 in the review could help to support learning:  
4

5 *'Perhaps have a bit more thought about how families should be engaged with might only need a short*  
6 *conversation, is there anything we need to know? Anything over and above what we have gathered*  
7 *that we [the NHS] need to know? They would have been able to gather from us very quickly that these*  
8 *are the key risks. I think that they could have drawn a lot more information from us [family] but*  
9 *basically that is lost because it is all very transactional - here is the response, this is what we are*  
10 *doing' (participant 12).*  
11  
12

13 In contrast, participants who felt included and listened to felt more confident about the safety of the  
14 healthcare system and were more satisfied:  
15

16 *'I was heard and it made me feel safe going forward in the future because I'm likely to have this*  
17 *(medical issue) again and I'm likely to be seen (by that healthcare professional) again.... So, it made*  
18 *me feel incredibly safe, it made me feel heard. And it was like, actually, that's all I want, that's all I*  
19 *need to feel safe going forward' (participant 5)*  
20  
21

22 Speaking with and including patients and their families in a compassionate way, as illustrated in the  
23 excerpt below, helped and was almost restorative following the traumatic loss of a baby:  
24

25 *'Our communication with the consultant...was really good....because she was being like a human*  
26 *being, a women who's a mother herself and she kind of slightly stepped back from her professional*  
27 *role and just spoke to you like an adult...it made us feel good because we knew she cared' (participant*  
28 *17).*  
29  
30

## 31 **Theme 2: Trauma – the challenges experienced during the review process**

  
32

33 This theme represents the challenges patients and their families experienced with the review or  
34 process. Participants reflected on the length of time it took for the review process to be completed. In  
35 the narrative below perceived inactivity during a lengthy review could impact negatively on mental  
36 health and lead to feelings of frustration and anxiety. Not being offered answers or a timely  
37 explanation contributed to negative views and impacted on wellbeing during what were already  
38 challenging times.  
39  
40

41 *'We are drawing this [the review] out longer and longer and longer. And I have to be careful, I don't*  
42 *drown myself in this whole process...I shouldn't have to sacrifice my own health and wellbeing just to*  
43 *get answers' (participant 8).*  
44  
45

46 Participants spoke of the long time it sometimes took review processes and the importance of timely  
47 communication and the frustration and the hurt when timescales were missed:  
48

49 *'I just wanted it to be over because it was quite stressful. I mean, they made a big mistake, lots of*  
50 *mistakes, and there wasn't an end to it for me, it was just dragging on' (participant 2).*  
51

52 Whilst in many cases an initial response appeared to be rapid, the subsequent provision of information  
53 was sometimes lacking, and this led to frustration and submission of a complaint:  
54

55 *'And within two weeks of putting in a complaint, I did have a meeting with the associate medical*  
56 *director. But after that, it seemed to me really slow and took almost two years...which is a long time*  
57 *to have it hanging over you. So, there was a lot of time between these meetings and letters where*  
58 *nothing was happening' (participant 2).*  
59  
60

1  
2  
3 One participant spoke about the lengths that they had gone to convey their experience following the  
4 death of a family member by writing a detailed letter. The lack of response led to anxiety and added to  
5 the trauma experienced:  
6

7 *'Well, it just didn't feel great [the NHS response]. Since then I have really thought about how the NHS*  
8 *responded to my letter...I had taken time over the timeline ....every single word I poured over and*  
9 *thought about because I wanted to present my situation and the things I felt wasn't right....., my*  
10 *language was very careful, so a week later, not to have received anything, every day I thought, when*  
11 *am I going to hear? I was nervous. I just wanted to hear back... my expectations were to receive*  
12 *something. So, to get nothing and then to have to write again it just felt like adding insult to injury'*  
13 *(participant 3).*  
14

15  
16 When timeframes were missed or extended this often led to a negative perception of the review  
17 process and additional stress and dissatisfaction:  
18

19 *'It's terrible...they sent an email saying that they want more time. They don't even tell you how much*  
20 *more time they want, it's frustrating. They initially offered a date.... but then, you know, that passed*  
21 *and no timescale of when they think they will have it looked at. It was just very much...open-ended'*  
22 *(participant 1).*  
23

24 Feelings of frustration and anger resonated through many of the interviews when follow-up  
25 communication did not occur. When there was no response to questions asked this could lead to  
26 suspicions of a cover-up and led participants to wonder if the service was hiding something.  
27

28 *'The scary bit is I am going to start laying the blame at them. And that was never the purpose of my*  
29 *questions. It was for my own satisfaction that I want to know that things were being done. But now I'm*  
30 *beginning to feel things were not done, and there was negligence going on' (participant 8).*  
31

32 Overwhelmingly, how the communication happened (or in some cases did not happen), and the  
33 timeframes involved were important to participants and are reflected on in the third theme, Learning.  
34

### 35 36 **Theme 3: Learning – the importance of closing the loop, and improving the healthcare system** 37 **and patient safety** 38

39 Closely linked to the earlier theme of communication and involvement is learning; this was important  
40 to all participants. Lack of engagement with patients and families contributed to fear of missed  
41 opportunities for improvement in the healthcare system and the same adverse event occurring to other  
42 patients. Although an apology was important, it was important to many participants that they knew  
43 what changes had been made following the adverse event:  
44

45 *'in terms of proper engagement....it would have been good to see what actually changed as a result*  
46 *...we don't know, and we will never know, actually, because the complaint was closed at that point*  
47 *because essentially we were satisfied that the complaint was upheld' (participant 12).*  
48

49 Again, the procedural nature of the response was spoken about with limited evidence of improvement:  
50

51 *'They just basically ticked the box, apologised for everything, upheld everything, and then it's like no*  
52 *further action. I can just file that. That's what I kind of feel because having gone back into the*  
53 *hospital, I don't particularly see that there's been much change' (participant 12).*  
54

55  
56 This excerpt and the one that follows highlighted participants experience of some parts of the  
57 healthcare system which may not have prioritised learning and improvement. This was disappointing  
58 for participants, many who had experienced the loss of a loved one or significant harm themselves.  
59 The overwhelming intention was to lessen the chance of something similar happening to others. The  
60

excerpts below highlights instances where the healthcare system did not lend itself to these changes:

*'complaining...gets me nowhere, people shut down, notes go missing, people close ranks. And then you're not heard, and you're not believed and actually they put the blame on me and say, oh, no, you're paranoid or whatever. I've had the whole works and also ...people are only human, we're dealing with human beings that are stressed out often' (participant 5).*

In these excerpts participants focus on the healthcare system, the pressure staff could be under and the importance of learning and not blaming individuals, interestingly in the excerpt below a senior leader in healthcare suggests greater individual responsibility:

*'I suppose there is anger with me as well, but it's just the system is not working, it's broken and I'm just very frustrated and I think as I said to them (the chief executive), I'm not looking to put anybody's head on the block here. It's a system that's not functioning properly. It was also pointed out to me that there is individual responsibility to make the system work and if people are not taking individual responsibilities properly then it's not going to work' (participant 8).*

Participants recognised the strain the healthcare system is under and the potential for human error, and, in the excerpt above, apportioning blame was not the intention, but the participant appears to suggest that in one instance a senior leader within healthcare was focused on 'individual responsibility' as opposed to a more system-based approach:

*'I wasn't looking for anybody and I am still not. My philosophy in life is that people make mistakes, we are all human and we make mistakes. Things are not going to work unless they (the health service) listen and then implement some sort of action' (participant 8).*

#### **Theme 4: Litigation – the opportunity to get answers where it was difficult to obtain answers elsewhere**

Overall, where participants did not feel included, listened to and supported in a compassionate way, or where the service did not evidence there had been learning, or there was a lack of feedback and timely communication, this increased the likelihood of seeking legal advice.

Seeking compensation was never the original intention of any of the participants, as evidenced in the excerpt below. Learning mattered more with litigation being an absolute last resort and used only when attempts to get answers and improvement had not been successful:

*'Right from the very beginning, people had said to go straight to a solicitor, but I didn't want to do that. I wanted just to make sure it never happens to anybody else. However, in the end, I thought that I've got nowhere, I really don't feel that they are taking much responsibility, so I just decided I would take it further' (participant 15).*

This is echoed by another participant who states:

*'I went two years and nine months without ever wanting compensation, and I've made that very clear from day one that was never my goal and I didn't want to profit (from the death of my loved one). But I decided to do this because I was being ignored and I knew that I'd get a reaction' (participant 13).*

Some participant's narratives focused on how the lack of inclusion forced them to seek legal advice, with their perception that healthcare services appeared more concerned about the potential for blame; litigation was used as a method to encourage engagement and get answers:

*'I just feel that the medical profession is so scared of being sued that it closes down...if they listened to people, and tried to rectify the mistakes, in a way that people actually wanted, there would be less*

*compensation and it's less confrontational' (participant 5).*

Within this theme, participants appear to outline how a more inclusive approach would not only be restorative for them it could be less adversarial for all involved with the potential to reduce litigation claims.

This participant recalled their personal experience with use of the word 'scared' indicative of how those in the health service appeared:

*'I've had medical records go missing when I put in a formal complaint. I think people are scared of being sued and don't want to take accountability. I think the NHS is so scared of being sued and it needs to get over it actually, we need to own up, we need to own our mistakes', actually people want less money, not more. And it takes a lot less time for the NHS than going through the courts and you'd pay the lawyers a lot less.'* (participant 5).

Key recommendations on enacting what matters to patients and family are shown in Table 3.

**Table 3: Key recommendations: what matters to patients and family**

| Key Recommendations            | Description                                                                                                                                                                                                                                                                                                                      |
|--------------------------------|----------------------------------------------------------------------------------------------------------------------------------------------------------------------------------------------------------------------------------------------------------------------------------------------------------------------------------|
| Apology                        | Say the words 'I am sorry or I apologise'. This should be timely (soon after the event). Show empathy 'I feel ashamed, uncomfortable, embarrassed that we let you down' or 'that we didn't get things right', or 'we fell short of the standard expected'.                                                                       |
| Inclusion                      | Explain you are interested in finding out why the adverse event happened and ask the patient or family for any insights they would like the review team to consider, actively listen and acknowledge these.                                                                                                                      |
| Timing                         | Provide regular updates throughout the review explain what you are doing to find out what happened. Communicate what you know, include, and acknowledge suggestions made by patients and family.                                                                                                                                 |
| Person-centred                 | Ask what matters to the patient and family. Record this and respond to this as part of the review process (often it is not what clinicians or reviewers think might be important to patients and families).                                                                                                                      |
| Just culture                   | Create just culture and psychological safety for staff (as second victims) and patients. Focus on learning and not blame i.e., what was it in the system, environment, tools that contributed to the event.                                                                                                                      |
| Compassionate communication    | Remain empathetic, even in situations fraught with anger or frustration. Be open to hear personal criticisms without withdrawing or becoming defensive.                                                                                                                                                                          |
| Redressing the power imbalance | Put patients and their families at the heart of reviews. Actively listen to their accounts, they may have vital pieces of information to enhance learning. Patient and families experience is their truth and should be represented as part of the review.                                                                       |
| Closing the loop               | Share learning with patients and families 'what we have learned from this is...' or 'Here is what we will do to avoid this happening again'. This should be communicated in a way that fits patient and family's needs (minimal use of jargon). Learning should be re-visited to ensure recommendations continue to be actioned. |

## Discussion

1  
2  
3 Findings from this study expand our understanding on patient and family experience and their  
4 perceptions of what ‘good’ patient and family involvement in adverse event reviews might look like.  
5 The interrelated themes depict the participants’ views on challenges with communication, lack of  
6 involvement and the importance of listening to what matters to them. During the qualitative  
7 interviews’ participants spoke freely on their experiences around lack of personalised communication  
8 and limited inclusion in the review process. This led to frustration and impacted on their wellbeing  
9 with some stating the only way to get answers was to force this through litigation. These findings  
10 concur with similar work in the Netherlands focused on suicide reviews <sup>6</sup> and a UK based study on  
11 parental engagement following perinatal mortality <sup>8</sup> where better inclusion of patients and families  
12 supported reconciliation, learning and reduced the likelihood of litigation <sup>7</sup>. Similarly, a mental  
13 welfare survey found almost two-thirds of carers and families felt their views were not sufficiently  
14 taken into account following death of a family member whilst under a compulsory treatment order <sup>19</sup>.

15  
16  
17  
18 Participants illustrated the review process was long and arduous and added to an already traumatic  
19 event. Participants suggested the following aspects, which if enacted, could make a real difference.  
20 Timely person-centred communication, early involvement inviting patients and their families to  
21 provide additional information to complement the review undertaken by healthcare professionals. .  
22 Communication focused on what matters to the patient or family should feel inclusive and not a  
23 procedural or tick box exercise. Crucial to participants satisfaction was ‘closing the loop’ (proving to  
24 patients and family that you have heard their feedback and are taking it seriously). Interestingly much  
25 of this concurs and builds on previous studies <sup>20</sup> and legislative ‘Duty of Candour’<sup>21</sup>.

26  
27  
28 Over two decades much research has already been published on this topic <sup>5,11,22,23</sup>. Despite this, our  
29 participants highlight the ongoing struggle to have their voices heard and redress the power imbalance  
30 in the review process. High-profile cases, such as the events occurring at the Mid-Staffordshire  
31 Hospital Trust<sup>24</sup>, Ockenden review of neo-natal maternity services<sup>5</sup> and the Vale of Leven Hospital  
32 inquiry<sup>25</sup> highlight open communication, disclosure and active involvement continues to fall short of  
33 patient and family expectations. Previous research completed in both Australia<sup>22</sup> and the United  
34 Kingdom<sup>26</sup> call for more consideration on the timing of disclosure, and the extent of patient and  
35 family involvement to be based on patient and family preferences. Much of this is more akin to the  
36 person-centred care ethos of putting patients at the heart of health services, focusing on ‘what matters  
37 to them’ as opposed to a more procedurally driven adverse events review process <sup>27</sup>. For patients and  
38 families this involves more than just offering an apology and a copy of the adverse event review  
39 report but asking patients and families what is important to them, what information they have that  
40 might be helpful for the review team to consider. Much of this is echoed in a previous study where  
41 patient and families contributed to morbidity and mortality reviews in gynaecological oncology  
42 departments, here patients and families gained a better understanding of the event and felt their views  
43 were taken seriously <sup>28</sup>. This study builds on the existing literature offering recommendations which  
44 should be useful for clinicians, risk advisors and governance leads involved in adverse event reviews  
45 (Table 3).

46  
47  
48 Whilst much has been achieved in the field of co-production, person-centred care, involving people in  
49 healthcare decision-making more widely, including the patient in patient safety remains an issue<sup>23</sup>.  
50 That said, the impact of an adverse event differs from most other healthcare interactions. Patients have  
51 been harmed, usually unintentionally, by the people or healthcare system in which they placed  
52 considerable trust, so their reaction may be especially powerful. This may require particular  
53 conditions in the healthcare system and specific skills and competencies for healthcare staff. A  
54 barrier to the openness and learning required to improve safety relates to perceptions around the  
55 healthcare system, fear of being blamed, reputational damage, negative media coverage and litigation  
56 <sup>29, 30</sup>. Tackling this requires the fostering of a ‘just culture’ where frontline staff feel able to explain  
57 conditions that contributed to the adverse event, and able to report mistakes within a health system  
58  
59  
60



1  
2  
3 focused on improvement and learning where individuals are not held accountable for system failings  
4<sup>31,32,33</sup>. Whilst this and other publications have now documented a clear direction of travel for  
5 inclusion of patients in patient safety, the focus should firmly be on enacting this.  
6  
7

8 A limitation of our study is that there was likely recruitment bias: most participants who responded to  
9 this study had a negative experience during adverse review processes and there may be patients and  
10 families who have had positive experiences but were less likely to share these. Nevertheless, the study  
11 provides very valuable insights and experiences which we hope will inform future improvements in  
12 adverse event review processes.  
13

## 14 **Conclusions/Key findings**

15  
16 This study illustrates what matters to patients and families using their suggestions to discuss  
17 improvement in practice. It adds detail on enacting this, with eight recommendations, (Table 3).  
18 Findings suggest that an open, collaborative process includes an apology, asking patient, family  
19 preferences for involvement in the review, appropriate timing, person-centred compassionate  
20 communication, redressing the power imbalance, closing the loop by communicating the learning and  
21 what steps are being considered to help prevent recurrence and similar events happening to others. For  
22 the health service, not listening to the patient and their family risks missing vital learning which could  
23 improve patient safety and quality of care. Engaging patients and families in reviews and  
24 communicating in a compassionate manner could also decrease litigation claims. Personalised  
25 conversations, a streamlined review process, focused on the healthcare system and circumstances  
26 around the event with open engagement to enhance learning are what mattered most to our  
27 participants.  
28  
29

## 30 **Funding**

31  
32 The joint commission for safety, openness, and learning, where this study originated, is committed to  
33 understanding patient and family perspectives. This study is part of a larger programme of work being  
34 undertaken by NHS Education for Scotland (NES) and Healthcare Improvement Scotland (HIS) on  
35 behalf of the Scottish Government.  
36  
37

## 38 **Acknowledgements**

39  
40 The authors are very grateful to all patients and family members who volunteered their time, shared  
41 their experience. The authors are also very grateful to Helen Munro our patient representative, who  
42 reviewed the interview schedule and commented on earlier drafts of this manuscript. Thank you to  
43 third sector partners and organisations for their support with recruitment (Breast Cancer Now, British  
44 Liver Trust, Care Opinion, Diabetes UK, Health and Social Care Alliance Scotland, Parkinson's  
45 Society UK, Penumbra, Prostate Cancer Scotland, Sepsis Trust, Support in Mind Scotland, Lauren  
46 Currie Twilight Foundation, Sands, Verity Polly-cystic ovary charity UK). Thank-you to Allan Gillies  
47 (NHS Education for Scotland) for support with literature searching, Anncriis Roberts and Kay Nichols  
48 our Scottish Government Sponsors.  
49  
50

51 **Data availability statement:** No data are available

52 **Ethics approval:** This study involves human participants and was approved by the West of Scotland  
53 Research Ethics Service REC ref no: 21/WS/0048 IRAS ID 297720

54 **Contributions:** JM designed the study, carried out data collection, analysed, interpreted and the  
55 drafted the paper. KG carried out data collection, analysed, interpreted, and reviewed draft  
56 manuscript. MM carried out data collection and reviewed draft paper. MF carried out data collection.  
57  
58  
59  
60

## References

1. WHO. World Alliance for Patient Safety, World Health Organisation Geneva: 2012  
[https://www.who.int/patientsafety/en/brochure\\_final.pdf](https://www.who.int/patientsafety/en/brochure_final.pdf)
2. Rathert C, Brandt J, Williams ES. Putting the ‘patient’ in patient safety: a qualitative study of consumer experiences. *Health Expect* 2012;**15**: 327-33
3. Wiig S, Haraldseid-Driftland C, Tvette Zachrisen R, *et al.* Next of kin involvement in regulatory investigations of adverse events that caused patient death: a process evaluation (Part I - the next of kin's perspective). *J Patient Saf.* 2021;**17**: e1713-e1718.
4. Cumberlege J. First do no harm: the report of the independent medicines and medical devices safety review. 2020. Available at: [https://www.immdsreview.org.uk/downloads/IMMDSReview\\_Web.pdf](https://www.immdsreview.org.uk/downloads/IMMDSReview_Web.pdf)
5. Ockeden D. Emerging findings and recommendations from the independent review of maternity services at the Shrewsbury and Telford Hospital NHS Trust. 2020. Available at: [https://assets.publishing.service.gov.uk/government/uploads/system/uploads/attachment\\_data/file/943011/Independent\\_review\\_of\\_maternity\\_services\\_at\\_Shrewsbury\\_and\\_Telford\\_Hospital\\_NHS\\_Trust.pdf](https://assets.publishing.service.gov.uk/government/uploads/system/uploads/attachment_data/file/943011/Independent_review_of_maternity_services_at_Shrewsbury_and_Telford_Hospital_NHS_Trust.pdf)
6. Bouwman R, de Graaff B, de Beurs D, *et al.* Involving patients and families in the analysis of suicides, suicide attempts, and other sentinel events in mental healthcare: a qualitative study in the Netherlands. *Int J Environ Res Public Health.* 2018;**15**: 1104.
7. Moore J, Bismark M, Mello MM. Patients’ experiences with communication and resolution programs after medical injury. *JAMA Intern Med* 2017;**177**: 1595-1603.
8. Bakhbaki D, Burden C, Storey C, *et al.* PARENTS 2 Study: a qualitative study of the views of healthcare professionals and stakeholders on parental engagement in the perinatal mortality review—from ‘bottom of the pile’ to joint learning. *BMJ Open* 2018;**8**: e023792.
9. Moore J, Mello MM. Improving reconciliation following medical injury: a qualitative study of responses to patient safety incidents in New Zealand [published online March 9], 2017. *BMJ Qual Saf.* doi:10.1136/bmjqs-2016-005804
10. O’Connor E, Coates HM, Yardley IE, *et al.* Disclosure of patient safety incidents: a comprehensive review. *Int J Qual Health Care* 2010;**22**: 371-9.
11. Iedema R, Sorensen R, Manias E, *et al.* Patients’ and family members’ experiences of open disclosure following adverse events. *Int J Qual Health Care* 2008;**20**: 421-32.
12. Vincent CA, Coulter A. Patient safety: what about the patient? *Qual Saf Health Care* 2002;**11**: 76–80.
13. Merner B, Hill S, Taylor M. “I’m trying to stop things before they happen”: carers’ contributions to patient safety in hospitals. *Qual Health Res* 2019;**29**: 1508-18.
14. Health Improvement Scotland. Building a national approach to learning from adverse events through reporting and review: a national framework for Scotland 2019. Available at: <file:///C:/Users/jeanm/OneDrive%20-%20NHS%20Scotland/Documents/PCC%20Master%20File/2.0%20CEIM/11.0%20Communication/20191216-AE-framework-4th-Edition.pdf>

15. Braun V, Clarke V. Using thematic analysis in psychology. *Qual Res Psychol* 2006;**3**: 77-101.
16. Smith JA, Flower P, Larkin M. Interpretative Phenomenological Analysis: Theory, Method and Research. London: Sage. 2009.
17. Medical Research Council. Principles and guidelines for good research practice. 2021. Available at: <https://www.ukri.org/publications/principles-and-guidelines-for-good-research-practice/>
18. Tong A, Sainsbury P, Craig J. Consolidated criteria for reporting qualitative research (COREQ): a 32-item checklist for interviews and focus groups. *Int J Qual Health Care* 2007;**19**: 349-57.
19. Mental Welfare Commission for Scotland. Deaths during compulsory treatment orders survey 2021: <https://www.gov.scot/publications/review-arrangements-investigating-deaths-patients-being-treated-mental-disorder/pages/4/>
20. van Dael J, Reader TW, Gillespie A, *et al.* Learning from complaints in healthcare: a realist review of academic literature, policy evidence and front-line insights. *BMJ Qual Saf* 2020;**29**: 684-95.
21. Professional Standards Authority. Telling patients the truth when something goes wrong: Evaluating the progress of professional regulators in embedding professionals' duty to be candid to patients. 2019. Available at: [https://www.professionalstandards.org.uk/docs/default-source/publications/research-paper/telling-patients-the-truth-when-something-goes-wrong---how-have-professional-regulators-encouraged-professionals-to-be-candid-to-patients.pdf?sfvrsn=100f7520\\_6](https://www.professionalstandards.org.uk/docs/default-source/publications/research-paper/telling-patients-the-truth-when-something-goes-wrong---how-have-professional-regulators-encouraged-professionals-to-be-candid-to-patients.pdf?sfvrsn=100f7520_6)
22. Case J, Walton M, Harrison R, *et al.* What Drives Patients' Complaints About Adverse Events in Their Hospital Care? A Data Linkage Study of Australian Adults 45 Years and Older. *Journal of Patient Safety* 2021;**17** (8), e1622-e1632.
23. Berger Z, Flickinger TE, Pfoh E, *et al.* Promoting engagement by patients and families to reduce adverse events in acute settings: a systematic review. *BMJ Qual Saf*. 2014;**23**: 548-55.
24. Mid Staffordshire Public Inquiry. Report of the Mid Staffordshire NHS Foundation Trust Public Inquiry; 2013. <https://webarchive.nationalarchives.gov.uk/ukgwa/20150407084231/http://www.midstaffpublicinquiry.com/report>
25. Health Improvement Scotland. The Vale of Leven Hospital Inquiry Report . Lord MacLean; 2014. <https://hub.careinspectorate.com/media/1415/vale-of-leven-hospital-inquiry-report.pdf>
26. Harrison R, Birks Y, Bosanquet K, *et al.* Enacting open disclosure in the UK National Health Service: A qualitative exploration. *J Eval Clin Pract*. 2017;**23**:713–718. <https://doi.org/10.1111/jep.12702>
27. Barry MJ, Edgman-Levitan S. Shared decision making – The pinnical of patient-centred care *N Engl J Med*. 2012; **366**:780-781.
28. Myren BJ, Hermens RRPMG, Koksma JJ, *et al.* Openness to new perspectives created by patient participation at the morbidity and mortality meeting. *Patient Educ Couns* 2021;**104**: 343-51.
29. Reynolds T. Openness is catching. 2014. Available at: <https://gmcuk.wordpress.com/2014/12/18/openness-is-catching/>
30. Radhakrishna S. Culture of blame in the National Health Service; consequences and solutions. *Br J Anaesth* 2015;**115**: 653-5.

- 1  
2  
3 31. Foslien-Nash C, Reed b. Just Culture IS not 'Just' Culture – It's shifting mindset. *Military*  
4 *Medicine* 2020, **185**, S3:52.  
5  
6 32. McNab D, Bowie P, Ross A, Morrison J. Understanding and responding when things go wrong:  
7 key principles for primary care educators. *Education for primary care* 2016 27:4p258-266  
8  
9 33. Gallagher TH, Waterman AD, Ebers AG, et al. Patients' and physicians' attitudes regarding the  
10 disclosure of medical errors. *JAMA*. 2003;289: 1001–1007  
11  
12  
13  
14  
15  
16  
17  
18  
19  
20  
21  
22  
23  
24  
25  
26  
27  
28  
29  
30  
31  
32  
33  
34  
35  
36  
37  
38  
39  
40  
41  
42  
43  
44  
45  
46  
47  
48  
49  
50  
51  
52  
53  
54  
55  
56  
57  
58  
59  
60

For peer review only

**Appendix One: Semi-structured interview questions**

- 1) **Are you the person involved in the incident or a representative or family member?**
- 2) **Can you tell me a bit about the NHS response to the patient safety event either you or your family member was involved in? Thinking about the event, can you tell me what helped and what could have been better in the response.**
- 3) **Did you feel listened to and included? Were you asked about what was important to you? Were you given the chance to talk about how you felt about the safety event and how it affected you? What helped and what didn't?**
- 4) **What about the explanation you received from the NHS regarding the event, how would you describe this? Was it in a format that was accessible to you/ written in plain English? How was the information shared – e mail, letter, face to face What helped and any improvements you think could be made? Were all your questions answered?**
- 5) **In what ways were the medical and nursing staff involved in the process? Did they speak to you, was this or would this have been helpful?**
- 6) **What about the communication or apology you received? How would you describe this? What helped or did not?**
- 7) **Which parts of the response/actions taken by the NHS help with your emotional healing and reconciliation? Are there any other organisations/support groups you would recommend which were helpful to you?**
- 8) **Did you get the opportunity to contribute or comment on the learning from the event? What form did this take? Were you able to share how you felt and how this event had affected you? Was this helpful? Would this have been helpful?**
- 9) **Is there anything else we have not spoken about that you feel would be helpful for me to know?**

## Standards for Reporting Qualitative Research (SRQR)\*

<http://www.equator-network.org/reporting-guidelines/srqr/>

Page/line no(s).

### Title and abstract

|                                                                                                                                                                                                                                                              |                                                                                                                                                                                   |
|--------------------------------------------------------------------------------------------------------------------------------------------------------------------------------------------------------------------------------------------------------------|-----------------------------------------------------------------------------------------------------------------------------------------------------------------------------------|
| <p><b>Title</b> - Concise description of the nature and topic of the study Identifying the study as qualitative or indicating the approach (e.g., ethnography, grounded theory) or data collection methods (e.g., interview, focus group) is recommended</p> | <p>P3 line 4 title reads Adverse event reviews in healthcare: What matters to patients and their family? A qualitative study exploring the perspective of patients and family</p> |
| <p><b>Abstract</b> - Summary of key elements of the study using the abstract format of the intended publication; typically includes background, purpose, methods, results, and conclusions</p>                                                               | <p>P3 line 16 headings used are Background, Objectives, Design, Setting, Participants, Results, Conclusions</p>                                                                   |

### Introduction

|                                                                                                                                                                     |                                                                                                              |
|---------------------------------------------------------------------------------------------------------------------------------------------------------------------|--------------------------------------------------------------------------------------------------------------|
| <p><b>Problem formulation</b> - Description and significance of the problem/phenomenon studied; review of relevant theory and empirical work; problem statement</p> | <p>P5 line 14 &amp; 22 Problem statement around lack of involvement of patients in adverse event reviews</p> |
| <p><b>Purpose or research question</b> - Purpose of the study and specific objectives or questions</p>                                                              | <p>p5 line 48 objective</p>                                                                                  |

### Methods

|                                                                                                                                                                                                                                                                                                                                  |                                                                                             |
|----------------------------------------------------------------------------------------------------------------------------------------------------------------------------------------------------------------------------------------------------------------------------------------------------------------------------------|---------------------------------------------------------------------------------------------|
| <p><b>Qualitative approach and research paradigm</b> - Qualitative approach (e.g., ethnography, grounded theory, case study, phenomenology, narrative research) and guiding theory if appropriate; identifying the research paradigm (e.g., postpositivist, constructivist/ interpretivist) is also recommended; rationale**</p> | <p>P5 line 53 interpretative phenomenological analysis with inductive thematic analysis</p> |
|----------------------------------------------------------------------------------------------------------------------------------------------------------------------------------------------------------------------------------------------------------------------------------------------------------------------------------|---------------------------------------------------------------------------------------------|

|                                                                                                                                                                                                                                |                                                                                                                                                                                                                                                                                                                                                                                                      |                                                                                                                                                                                                                                                                                                                                                                                                                                                                                                                                                                |
|--------------------------------------------------------------------------------------------------------------------------------------------------------------------------------------------------------------------------------|------------------------------------------------------------------------------------------------------------------------------------------------------------------------------------------------------------------------------------------------------------------------------------------------------------------------------------------------------------------------------------------------------|----------------------------------------------------------------------------------------------------------------------------------------------------------------------------------------------------------------------------------------------------------------------------------------------------------------------------------------------------------------------------------------------------------------------------------------------------------------------------------------------------------------------------------------------------------------|
| 1<br>2<br>3<br>4<br>5<br>6<br>7                                                                                                                                                                                                | <b>Researcher characteristics and reflexivity</b> - Researchers' characteristics that may influence the research, including personal attributes, qualifications/experience, relationship with participants, assumptions, and/or presuppositions; potential or actual interaction between researchers' characteristics and the research questions, approach, methods, results, and/or transferability | P7 line 12                                                                                                                                                                                                                                                                                                                                                                                                                                                                                                                                                     |
| 8<br>9<br>10<br>11<br>12<br>13<br>14<br>15<br>16<br>17<br>18<br>19<br>20<br>21<br>22<br>23<br>24<br>25<br>26<br>27<br>28<br>29<br>30<br>31<br>32<br>33<br>34<br>35<br>36<br>37<br>38<br>39<br>40<br>41<br>42<br>43<br>44<br>45 |                                                                                                                                                                                                                                                                                                                                                                                                      | <p>P7 line 48 IPA was chosen because allowed exploration of individuals' lived experience and how they make sense of this</p> <p>P5 line 56 Telephone interviews were chosen as the most convenient, accessible, cost effective option for participants and afforded our participants a greater degree of privacy and anonymity when compared with video calls or face to face interviews.</p> <p>P5 line 58 The setting for our research was NHS Scotland as this study was supported by the Scottish government and our national adverse events network.</p> |
| 46                                                                                                                                                                                                                             | <b>Context</b> - Setting/site and salient contextual factors; rationale**                                                                                                                                                                                                                                                                                                                            |                                                                                                                                                                                                                                                                                                                                                                                                                                                                                                                                                                |
| 47<br>48<br>49<br>50                                                                                                                                                                                                           | <b>Sampling strategy</b> - How and why research participants, documents, or events were selected; criteria for deciding when no further sampling was necessary (e.g., sampling saturation); rationale**                                                                                                                                                                                              | Data saturation<br>p7 line 54                                                                                                                                                                                                                                                                                                                                                                                                                                                                                                                                  |
| 51<br>52<br>53<br>54                                                                                                                                                                                                           | <b>Ethical issues pertaining to human subjects</b> - Documentation of approval by an appropriate ethics review board and participant consent, or explanation for lack thereof; other confidentiality and data security issues                                                                                                                                                                        | P7 line<br>33 research ethics approval                                                                                                                                                                                                                                                                                                                                                                                                                                                                                                                         |

|                                  |                                                                                                                                                                                                                                                                                                                          |                                                               |
|----------------------------------|--------------------------------------------------------------------------------------------------------------------------------------------------------------------------------------------------------------------------------------------------------------------------------------------------------------------------|---------------------------------------------------------------|
| 1<br>2<br>3<br>4<br>5            | <b>Data collection methods</b> - Types of data collected; details of data collection procedures including (as appropriate) start and stop dates of data collection and analysis, iterative process, triangulation of sources/methods, and modification of procedures in response to evolving study findings; rationale** | P7 line 44 p7 line 36<br>P6 line 9                            |
| 6<br>7<br>8<br>9                 | <b>Data collection instruments and technologies</b> - Description of instruments (e.g., interview guides, questionnaires) and devices (e.g., audio recorders) used for data collection; if/how the instrument(s) changed over the course of the study                                                                    | Interview guide appendix 1 p2 line 4                          |
| 10<br>11<br>12<br>13<br>14<br>15 | <b>Units of study</b> - Number and relevant characteristics of participants, documents, or events included in the study; level of participation (could be reported in results)                                                                                                                                           | table 1 p6<br>Level of participation p6 line 29 & p16 line 21 |
| 16<br>17<br>18<br>19             | <b>Data processing</b> - Methods for processing data prior to and during analysis, including transcription, data entry, data management and security, verification of data integrity, data coding, and anonymization/de-identification of excerpts                                                                       | P7 line 24 & 46                                               |
| 20<br>21<br>22<br>23             | <b>Data analysis</b> - Process by which inferences, themes, etc., were identified and developed, including the researchers involved in data analysis; usually references a specific paradigm or approach; rationale**                                                                                                    | P7 line 48,                                                   |
| 24<br>25<br>26<br>27             | <b>Techniques to enhance trustworthiness</b> - Techniques to enhance trustworthiness and credibility of data analysis (e.g., member checking, audit trail, triangulation); rationale**                                                                                                                                   | P6 line 58                                                    |

## Results/findings

|                      |                                                                                                                                                                                                   |                                                   |
|----------------------|---------------------------------------------------------------------------------------------------------------------------------------------------------------------------------------------------|---------------------------------------------------|
| 30<br>31<br>32<br>33 | <b>Synthesis and interpretation</b> - Main findings (e.g., interpretations, inferences, and themes); might include development of a theory or model, or integration with prior research or theory | P8 line 5 table 2                                 |
| 34<br>35<br>36<br>37 | <b>Links to empirical data</b> - Evidence (e.g., quotes, field notes, text excerpts, photographs) to substantiate analytic findings                                                               | Quotes from participants are used p8 line 42 .... |

## Discussion

|                                                                                                          |                                                                                                                                                                                                                                                                                                                                                                                                             |                                                                                                                                                                                                                                                           |
|----------------------------------------------------------------------------------------------------------|-------------------------------------------------------------------------------------------------------------------------------------------------------------------------------------------------------------------------------------------------------------------------------------------------------------------------------------------------------------------------------------------------------------|-----------------------------------------------------------------------------------------------------------------------------------------------------------------------------------------------------------------------------------------------------------|
| 40<br>41<br>42<br>43<br>44<br>45<br>46<br>47<br>48<br>49<br>50<br>51<br>52<br>53<br>54<br>55<br>56<br>57 | <b>Integration with prior work, implications, transferability, and contribution(s) to the field</b> - Short summary of main findings; explanation of how findings and conclusions connect to, support, elaborate on, or challenge conclusions of earlier scholarship; discussion of scope of application/generalizability; identification of unique contribution(s) to scholarship in a discipline or field | P13 line 33 Over two decades much research has already been published This study builds on the existing literature .....It offers key recommendations which should be useful for clinicians, risk advisors and governance leads involved in adverse event |
|----------------------------------------------------------------------------------------------------------|-------------------------------------------------------------------------------------------------------------------------------------------------------------------------------------------------------------------------------------------------------------------------------------------------------------------------------------------------------------------------------------------------------------|-----------------------------------------------------------------------------------------------------------------------------------------------------------------------------------------------------------------------------------------------------------|



|                                                                  |                          |
|------------------------------------------------------------------|--------------------------|
|                                                                  | reviews (Table 3)<br>p12 |
| <b>Limitations</b> - Trustworthiness and limitations of findings | P14 line 13              |

**Other**

|                                                                                                                                               |                                |
|-----------------------------------------------------------------------------------------------------------------------------------------------|--------------------------------|
| <b>Conflicts of interest</b> - Potential sources of influence or perceived influence on study conduct and conclusions; how these were managed | No known conflicts of interest |
| <b>Funding</b> - Sources of funding and other support; role of funders in data collection, interpretation, and reporting                      | P14 line 39                    |

\*The authors created the SRQR by searching the literature to identify guidelines, reporting standards, and critical appraisal criteria for qualitative research; reviewing the reference lists of retrieved sources; and contacting experts to gain feedback. The SRQR aims to improve the transparency of all aspects of qualitative research by providing clear standards for reporting qualitative research.

\*\*The rationale should briefly discuss the justification for choosing that theory, approach, method, or technique rather than other options available, the assumptions and limitations implicit in those choices, and how those choices influence study conclusions and transferability. As appropriate, the rationale for several items might be discussed together.

**Reference:**

O'Brien BC, Harris IB, Beckman TJ, Reed DA, Cook DA. **Standards for reporting qualitative research: a synthesis of recommendations.** *Academic Medicine*, Vol. 89, No. 9 / Sept 2014  
DOI: [10.1097/ACM.0000000000000388](https://doi.org/10.1097/ACM.0000000000000388)
